# Supplementary material for: Very High Yield of Urgent Small-Bowel Capsule Endoscopy for Ongoing Overt Suspected Small-Bowel Bleeding Irrespective of the Usual Predictive Factors
Source: MDPI journal article supplement (doi:10.3390/diagnostics12112685), 2022-11-04
Supplement: s1 [file s1]

**Supplementary table S1.** Capsule models used in the study, numbers of patients and incomplete examinations.

| Capsule model  | Number of patients | Number of incomplete examinations |
|----------------|--------------------|-----------------------------------|
| Mirocam MC1200 | 19                 | 5                                 |
| Mirocam MC1600 | 47                 | 7                                 |
| Pillcam SB     | 5                  | 2                                 |
| Pillcam SB2    | 12                 | 1                                 |
| Total          | 83                 | 15                                |

**Supplementary table S2.** Influence of patient-related factors on SBCE completeness and bowel cleansing.

| Baseline characteristics              |     | Incomplete SBCE<br>(n=15) |                | Inadequate cleansing<br>(n=17) |                |
|---------------------------------------|-----|---------------------------|----------------|--------------------------------|----------------|
| Male sex                              | Yes | 11/50                     | p=0.383        | 9/50                           | p=0.582        |
|                                       | No  | 4/33                      |                | 8/33                           |                |
| Age equal or above to 65<br>years old | Yes | 9/49                      | p=0.886        | 11/49                          | <b>p=0.046</b> |
|                                       | No  | 6/34                      |                | 6/34                           |                |
| Chronic heart disease                 | Yes | 9/41                      | p=0.267        | 10/41                          | p=0.426        |
|                                       | No  | 6/42                      |                | 7/42                           |                |
| Diabetes mellitus                     | Yes | 9/28                      | <b>p=0.032</b> | 4/28                           | p=0.397        |
|                                       | No  | 6/55                      |                | 13/55                          |                |
| Chronic kidney disease                | Yes | 2/13                      | p=0.570        | 1/13                           | p=0.286        |
|                                       | No  | 13/70                     |                | 16/70                          |                |
| Chronic liver disease                 | Yes | 2/7                       | p=0.605        | 1/7                            | p=0.998        |
|                                       | No  | 13/76                     |                | 16/76                          |                |
